# Supplementary material
Source: Royal Society of Chemistry journal article supplement (doi:10.1039/d6ay00742b)

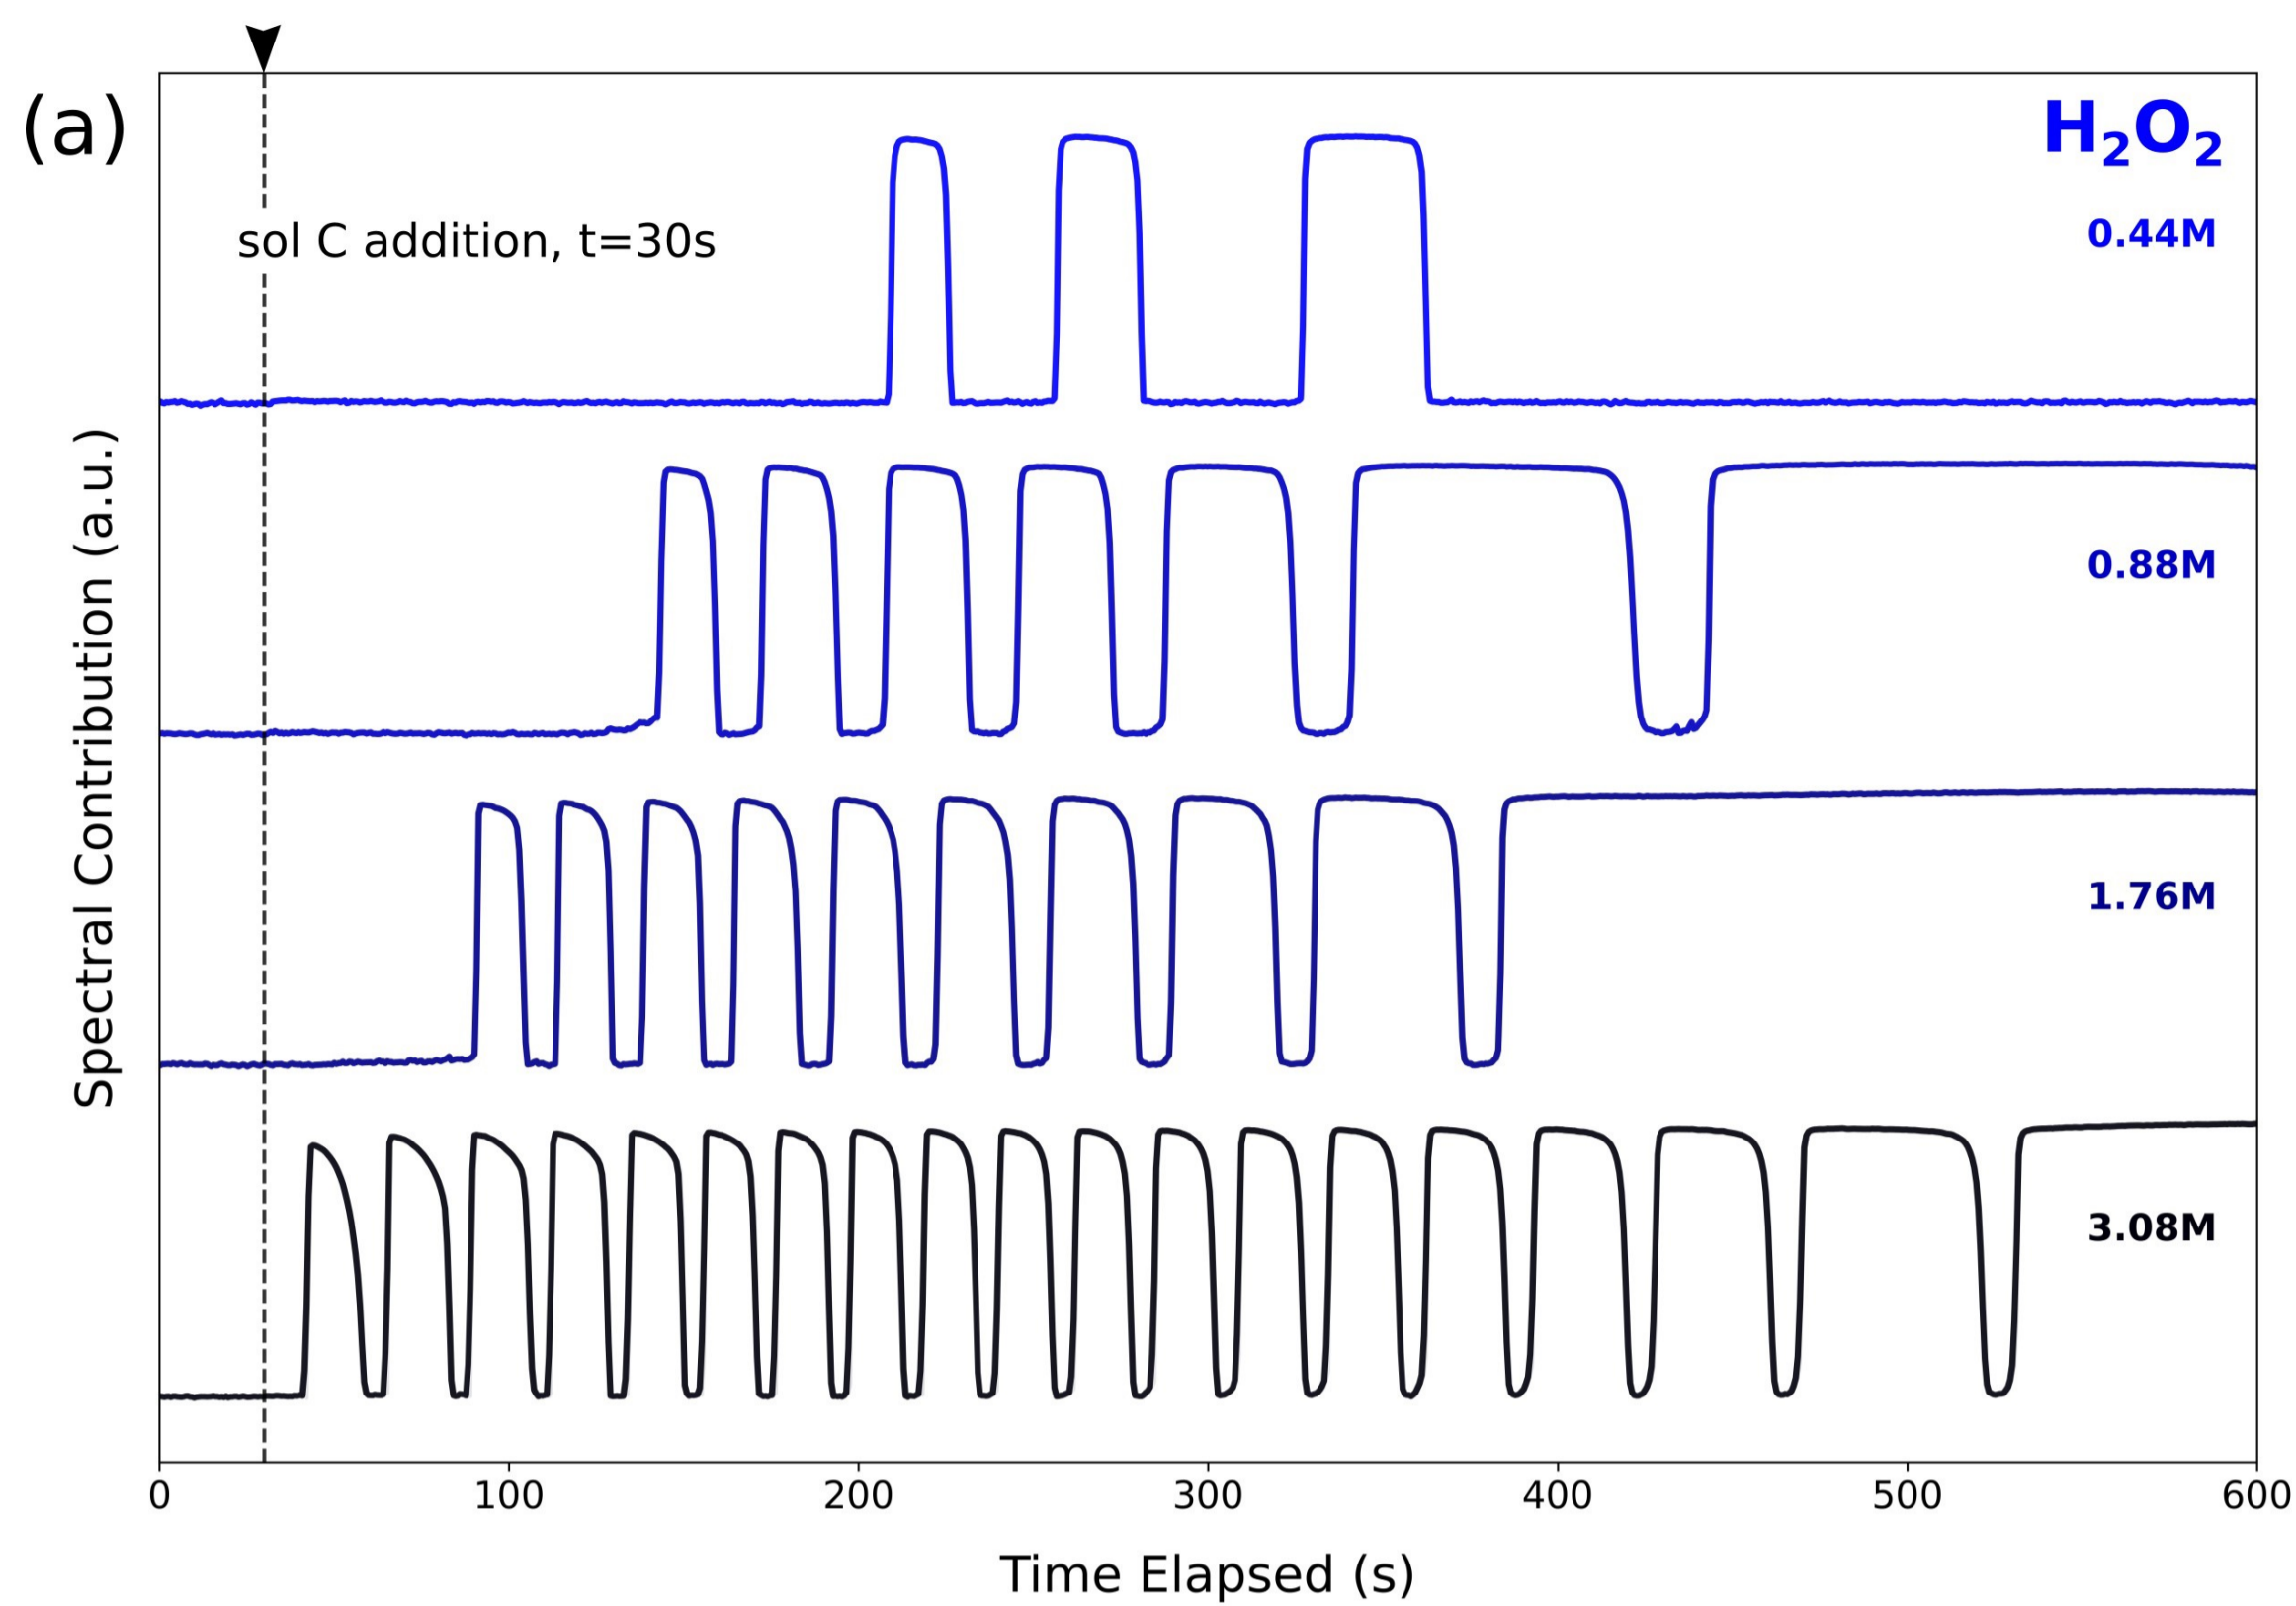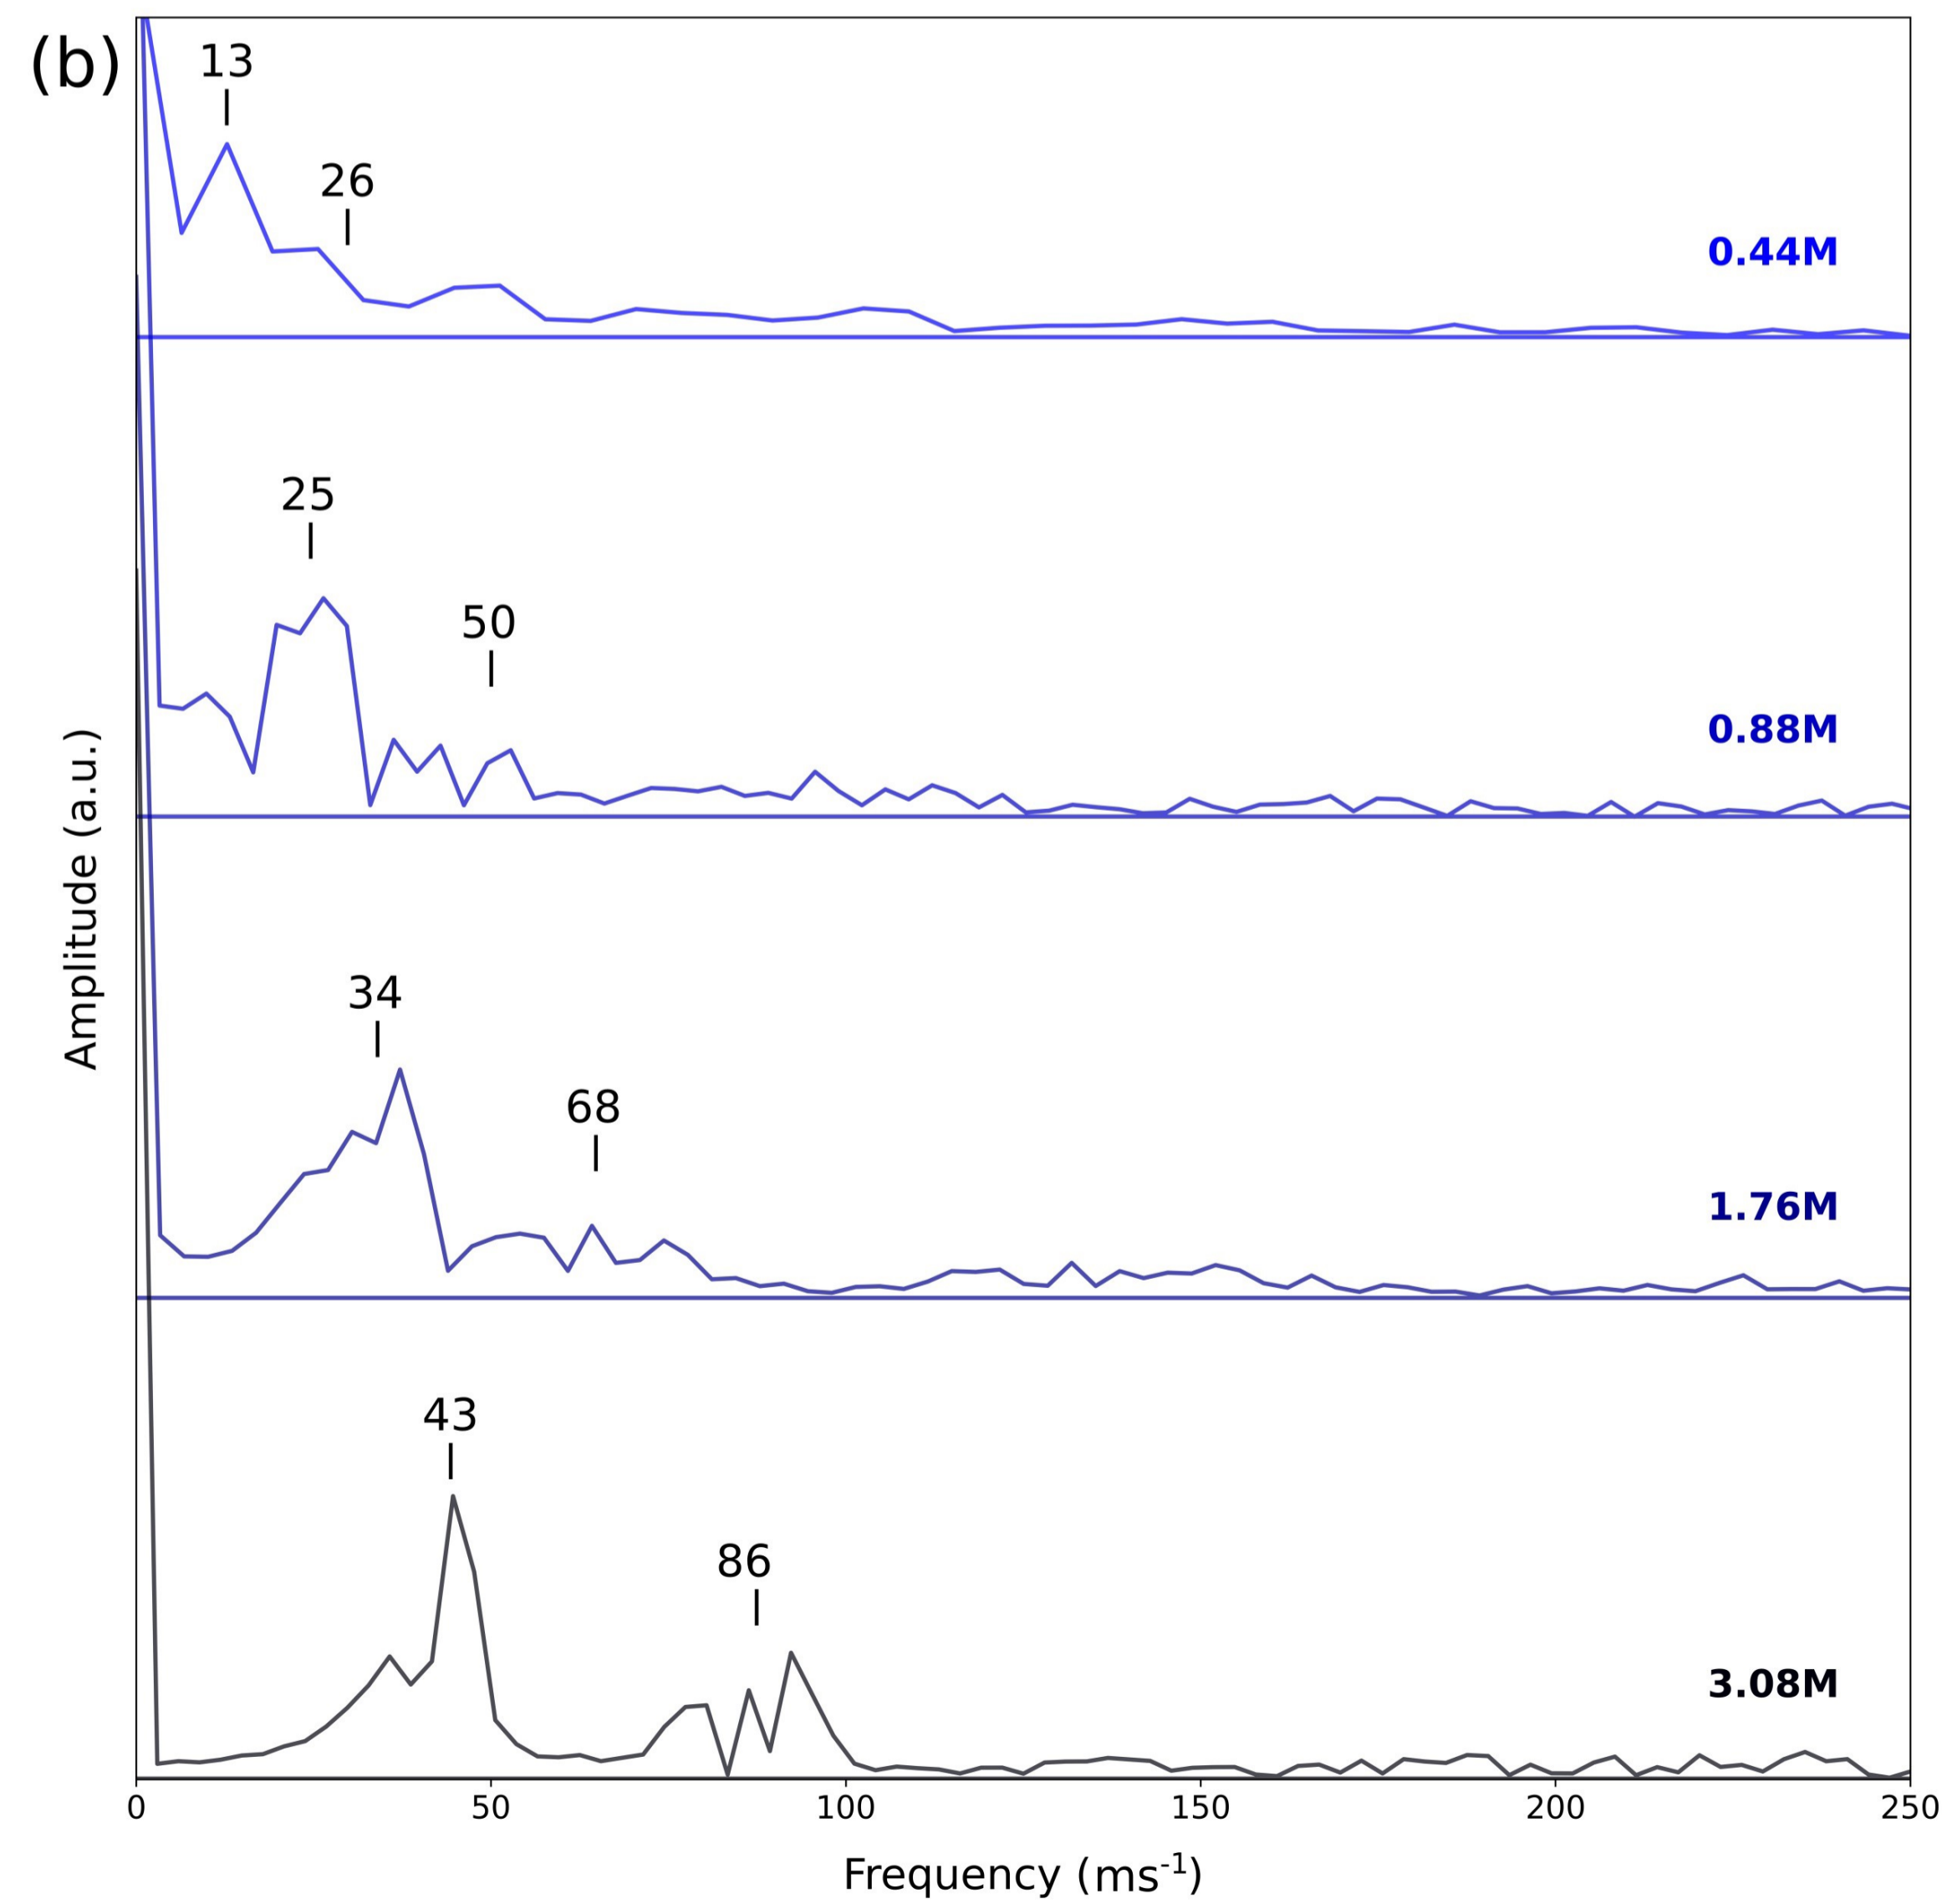

Supplement: d6ay00742b10.pdf [file d6ay00742b10.pdf]

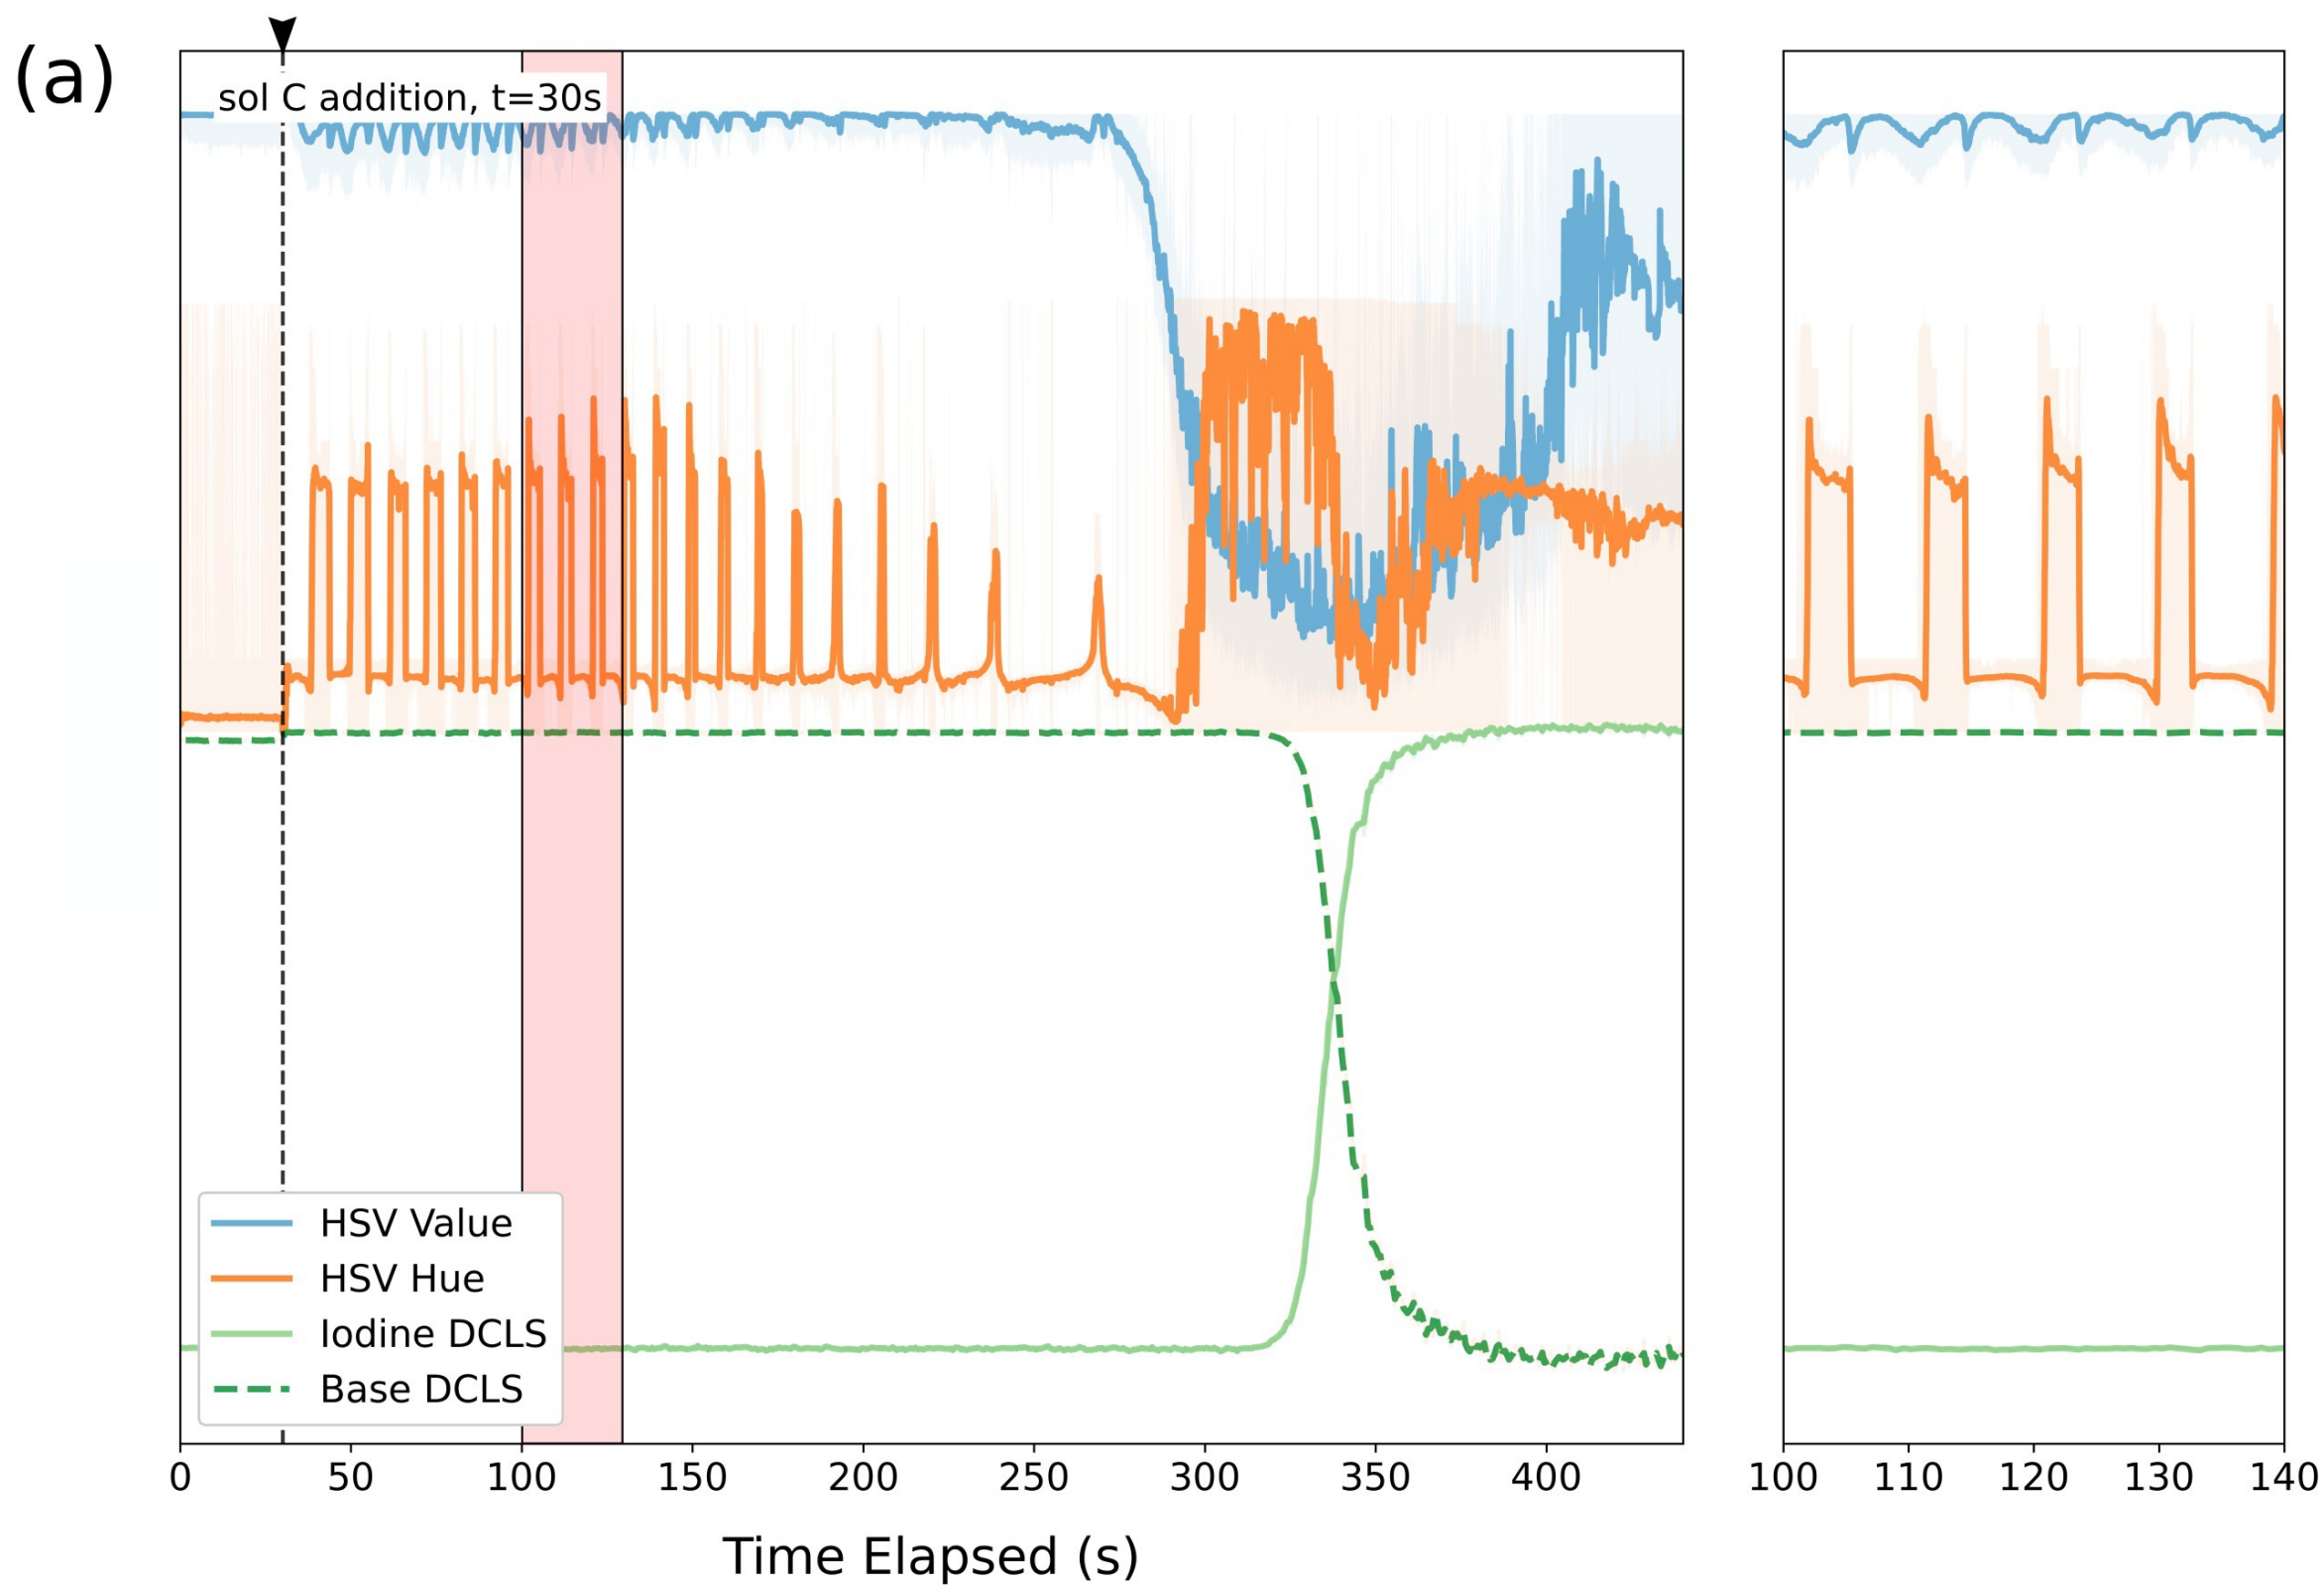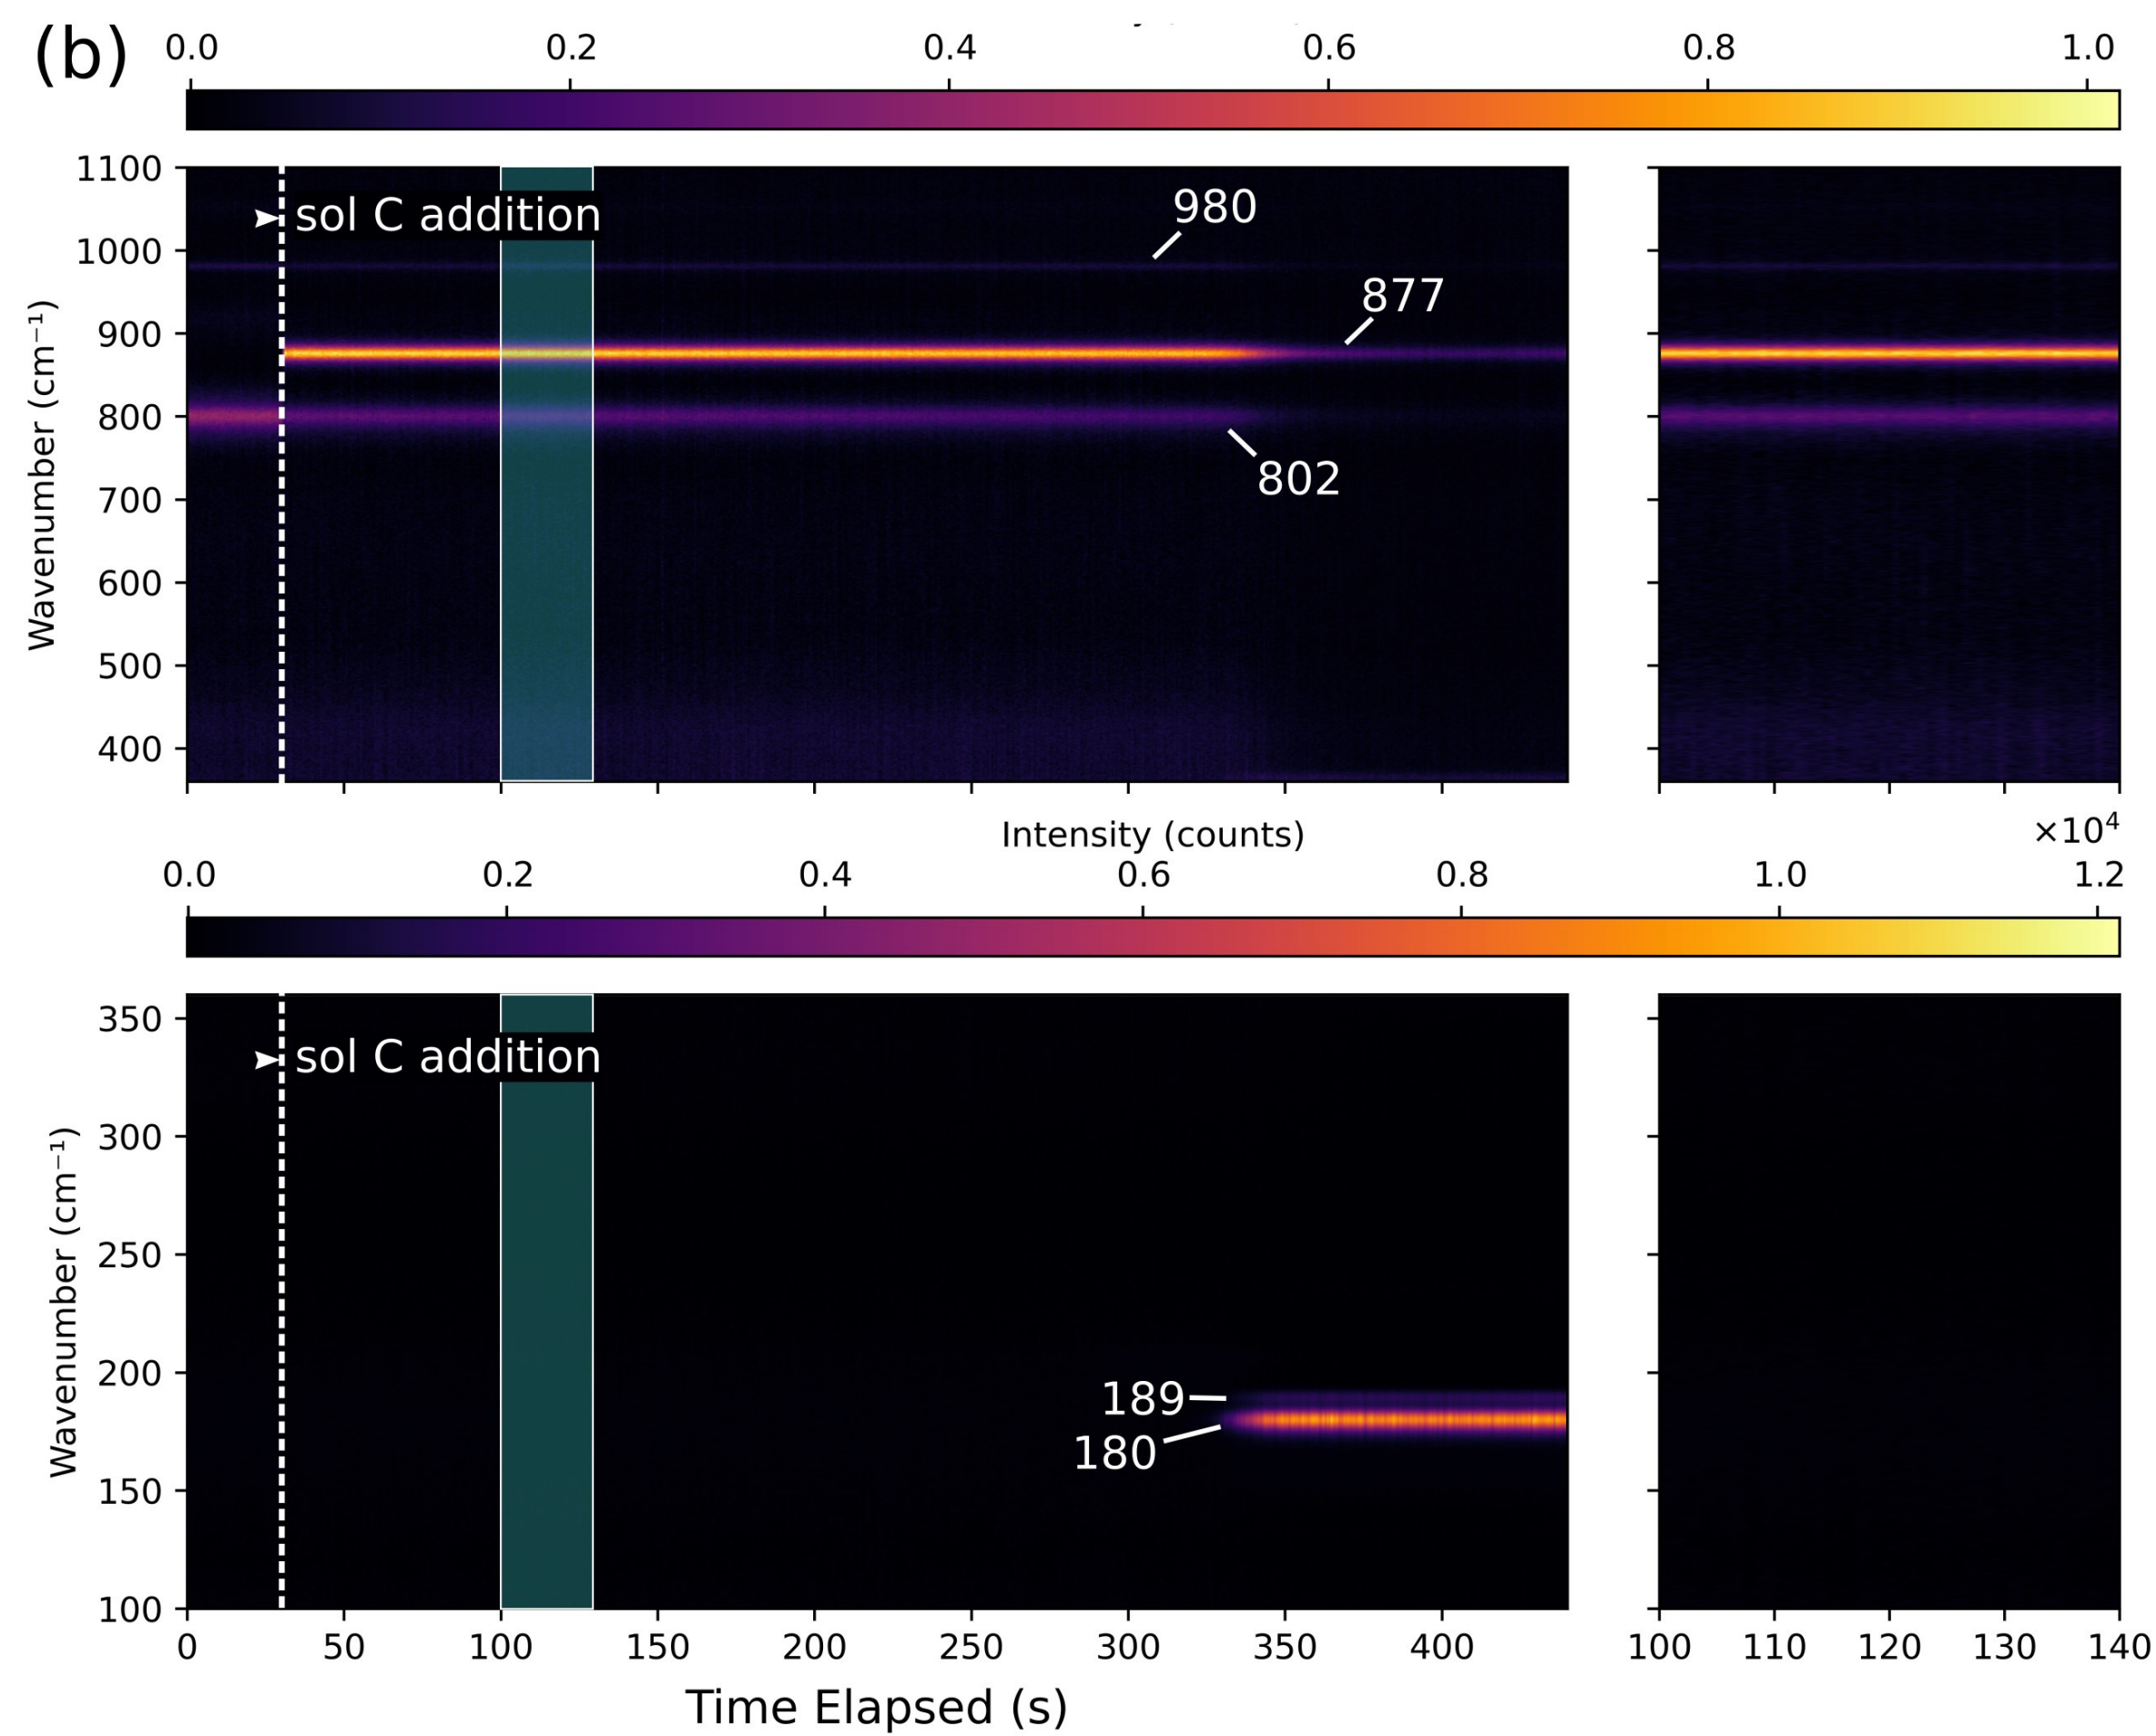

Supplement: d6ay00742b11.pdf [file d6ay00742b11.pdf]

Spectral Plot\_briggs\_rauscher\_run2\_700c\_0\_5e\_86p\_1a\_0i

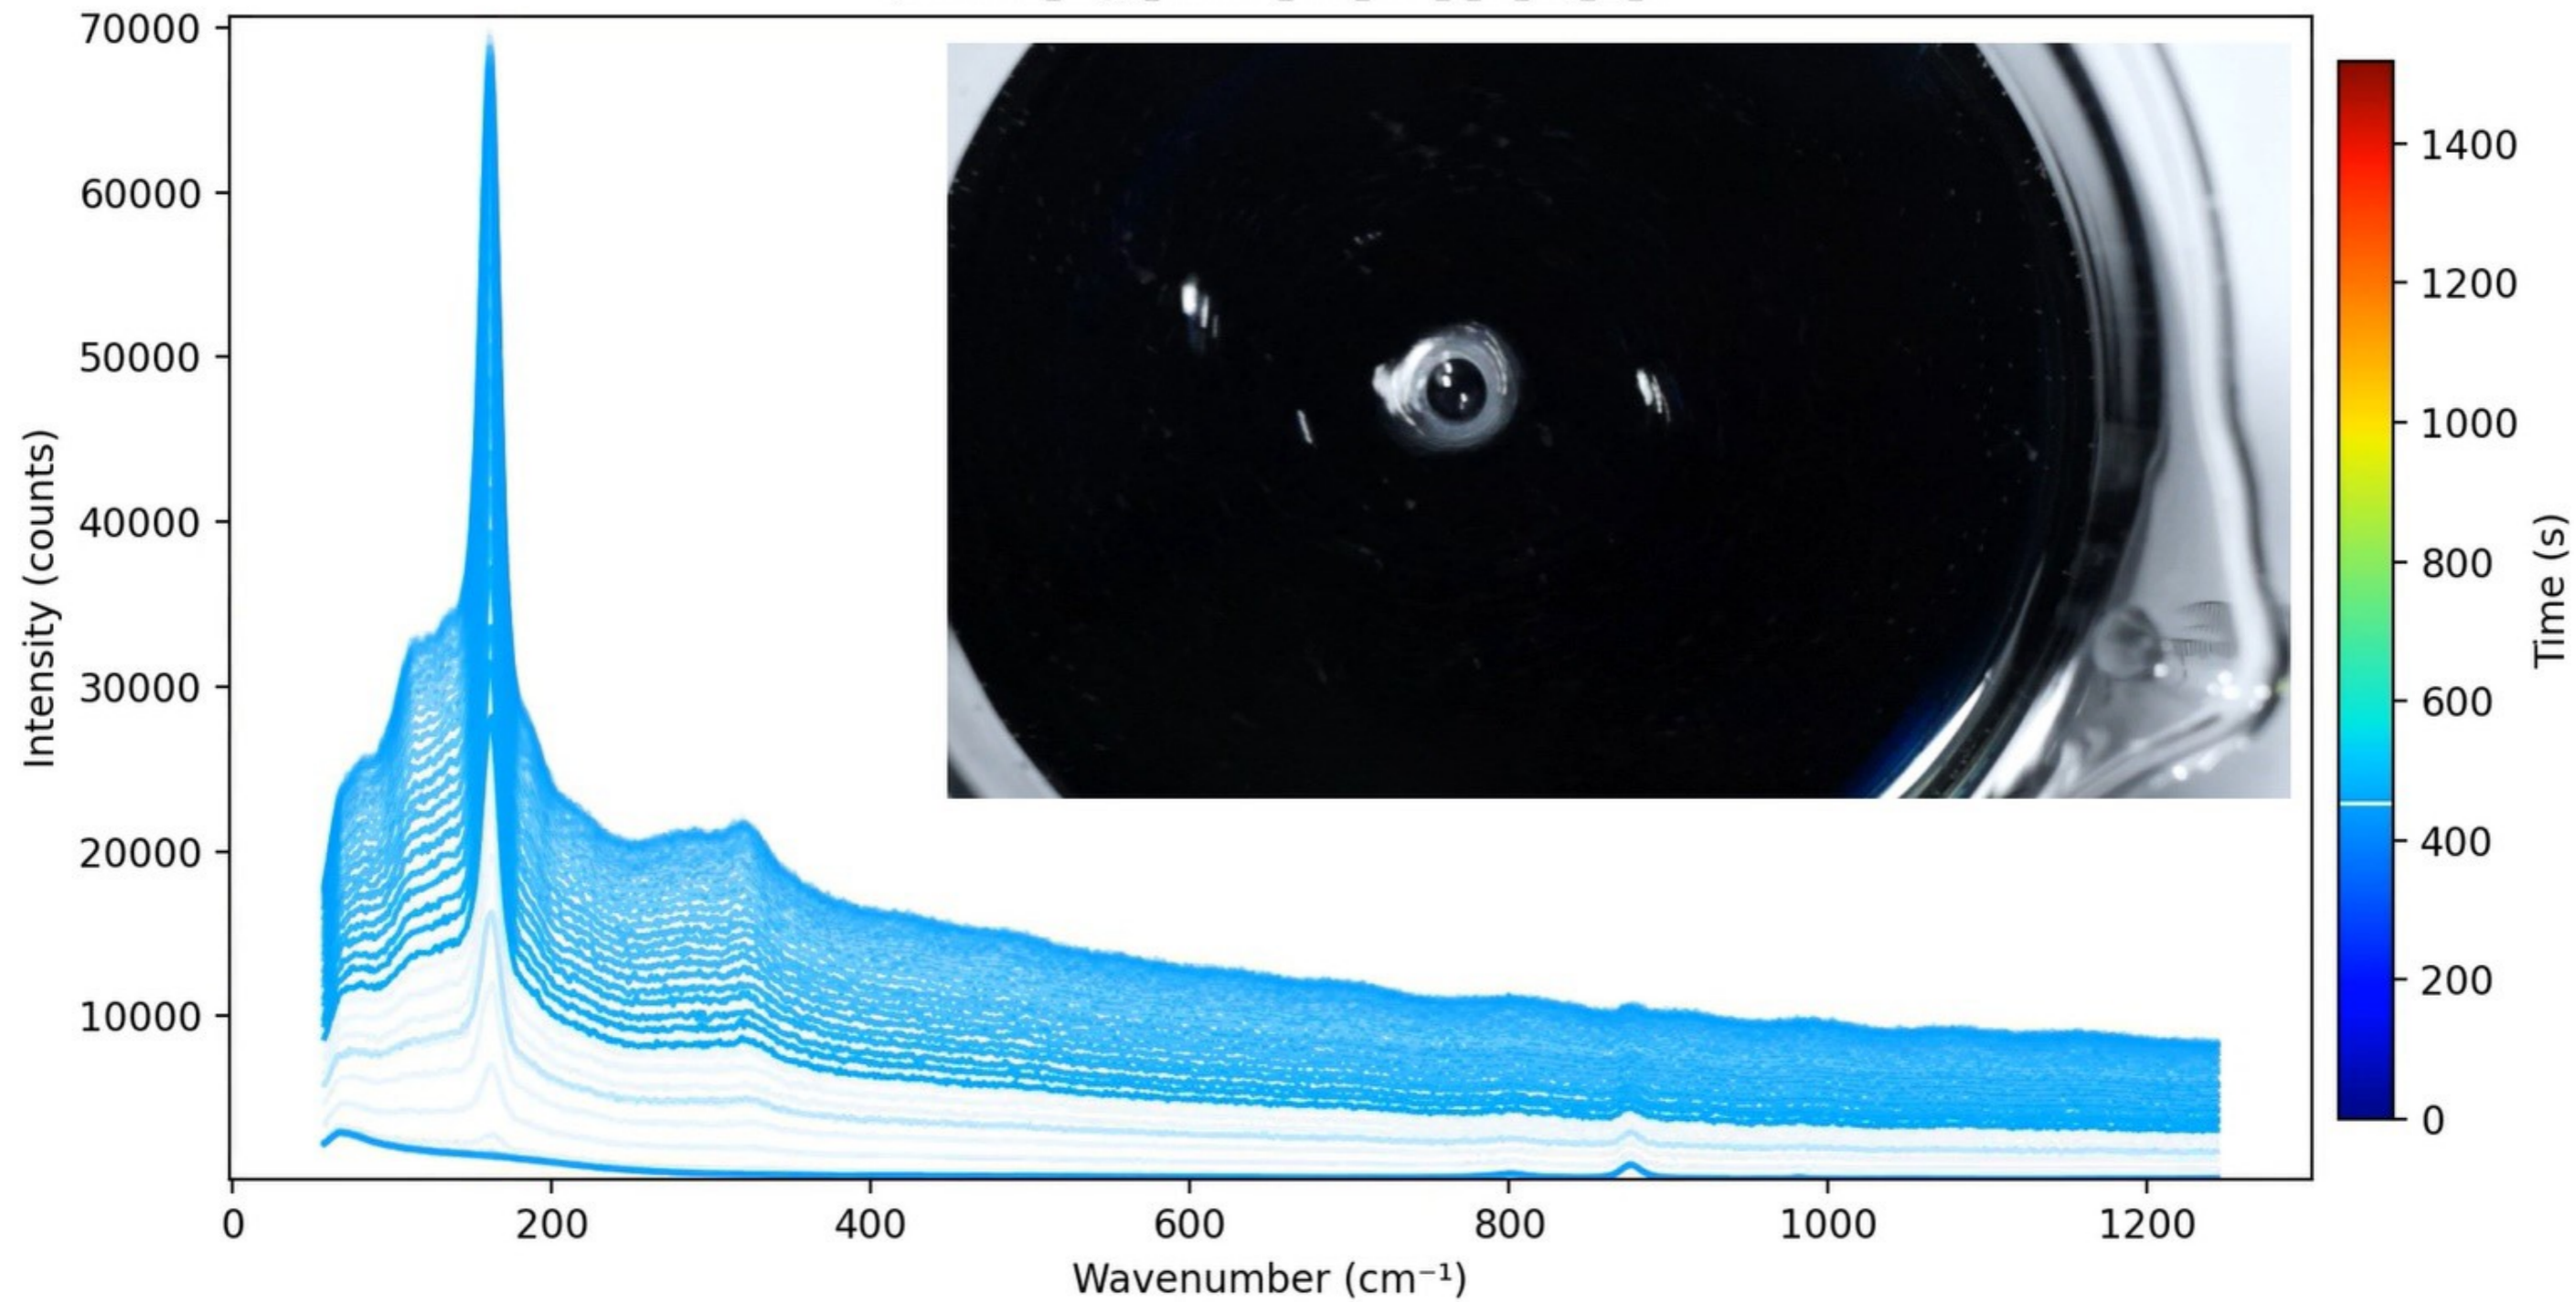

Supplement: d6ay00742b6.pdf [file d6ay00742b6.pdf]

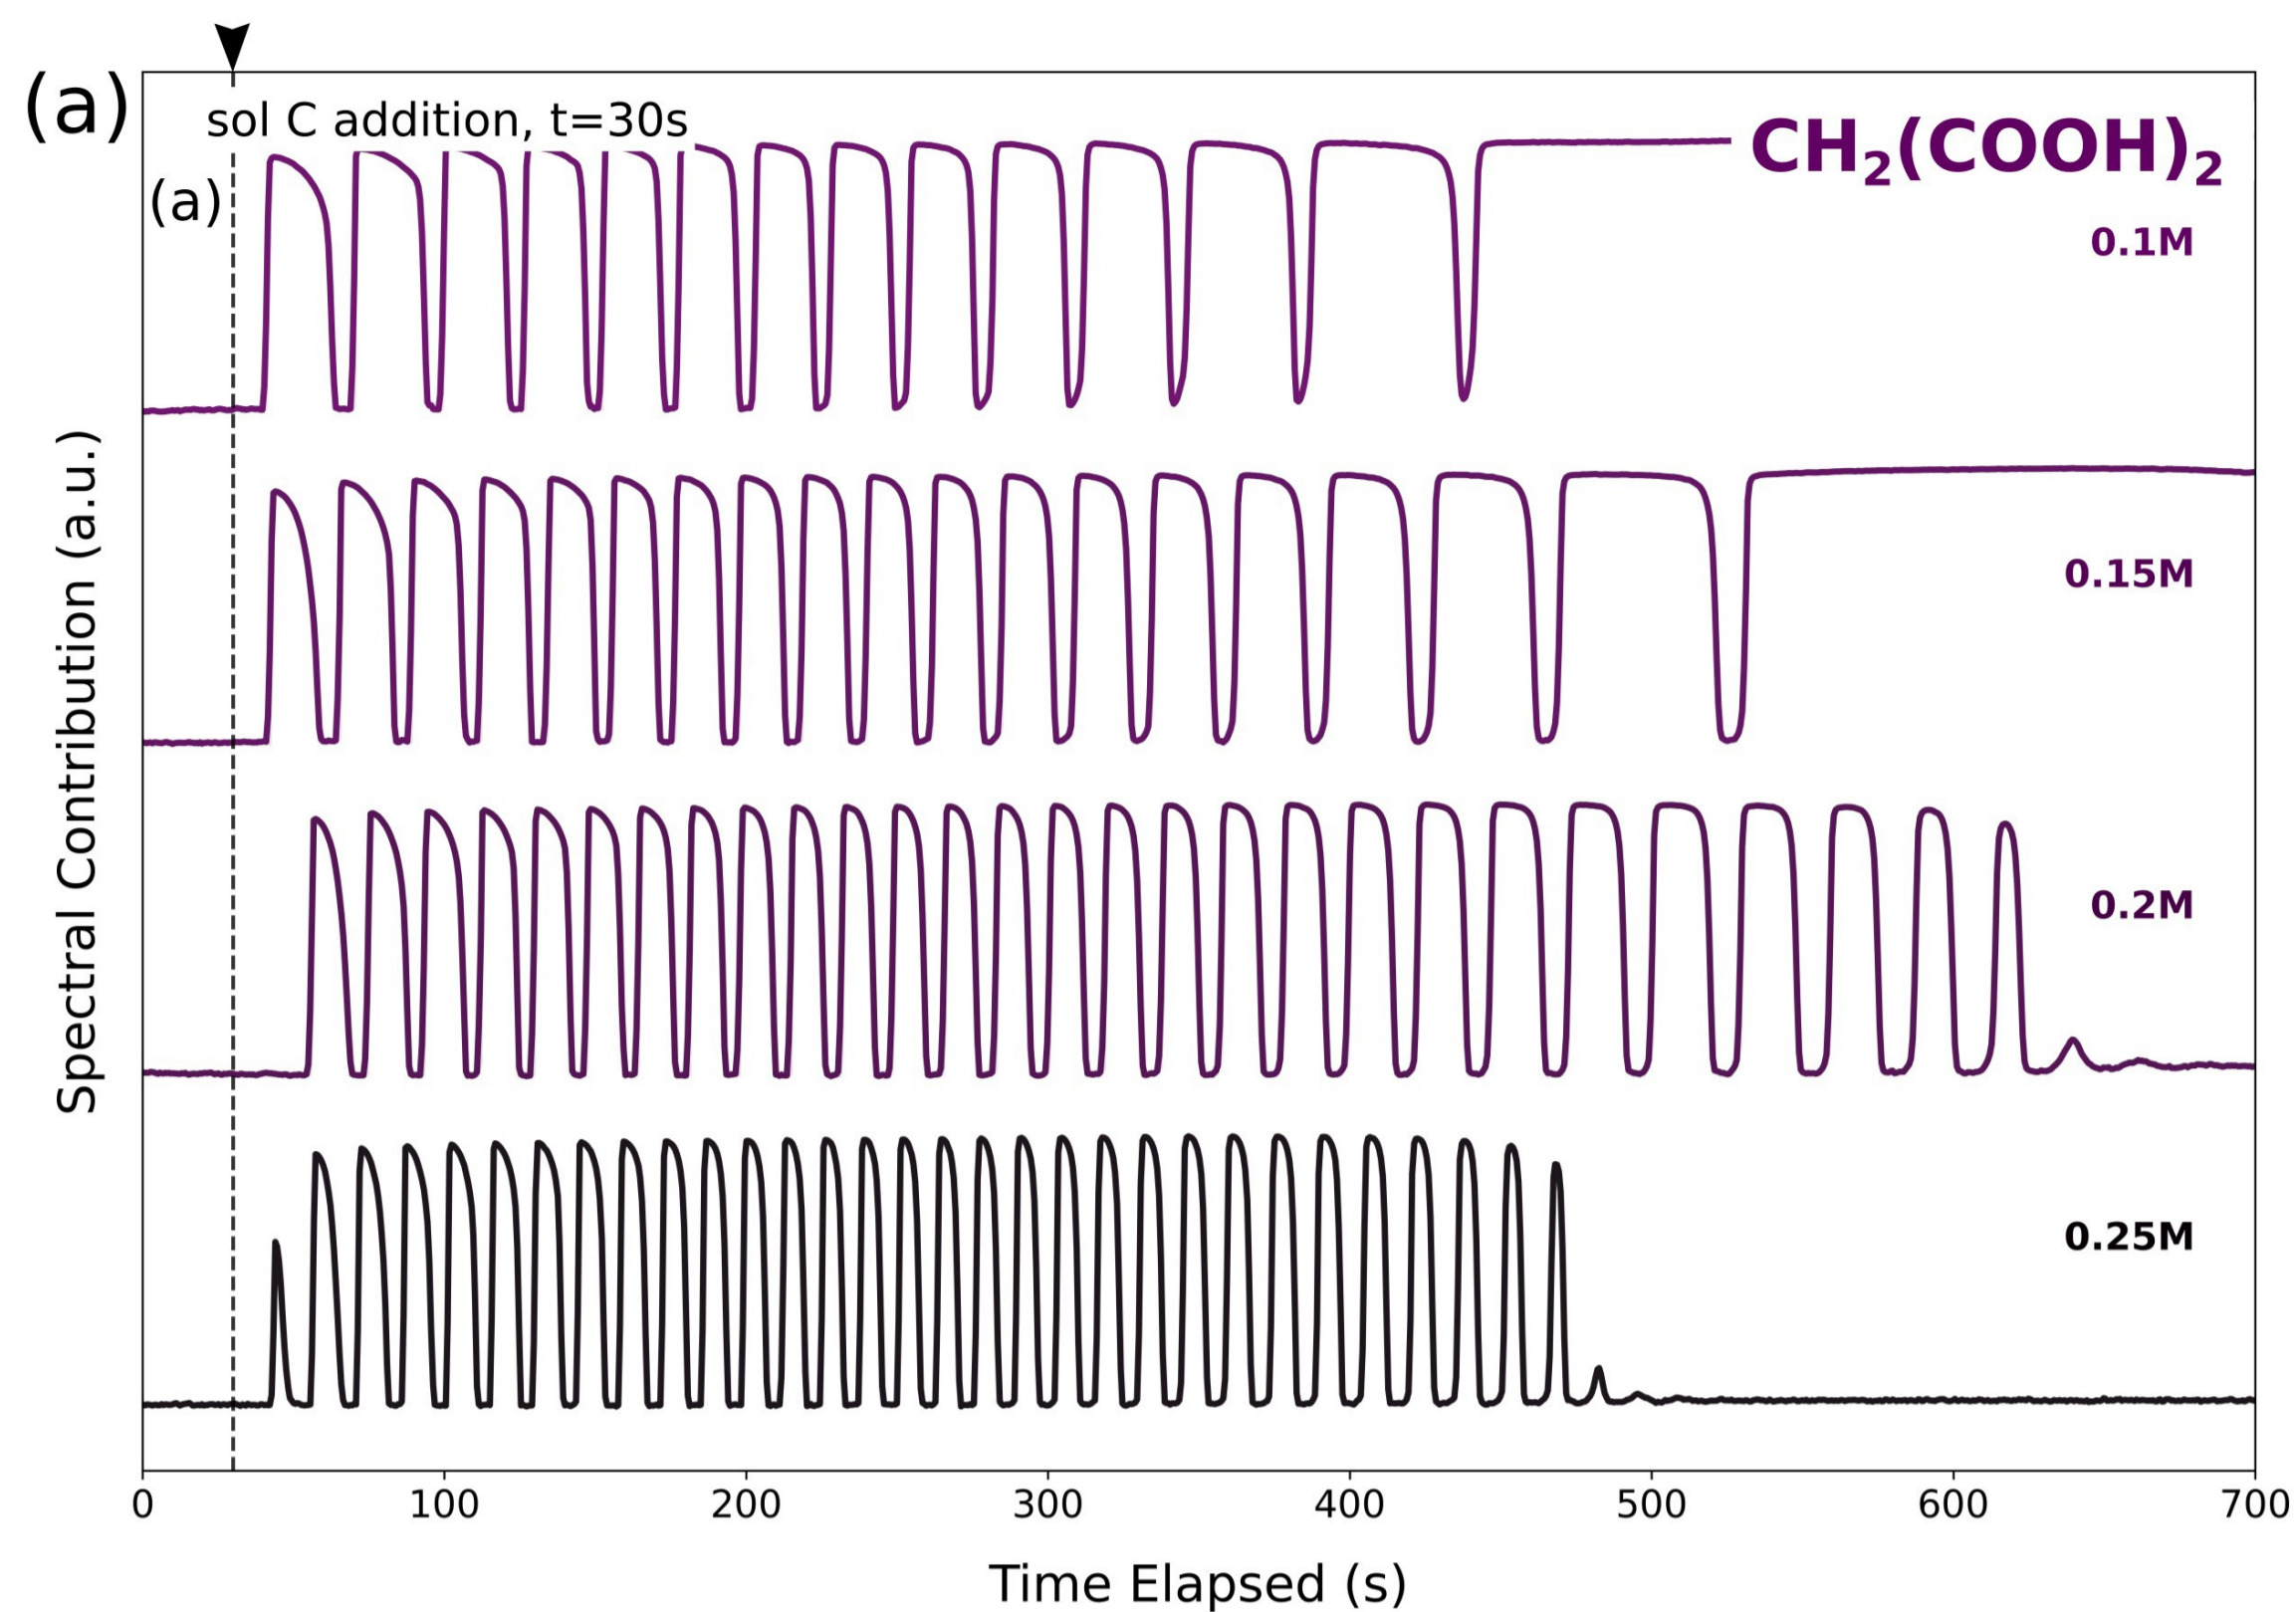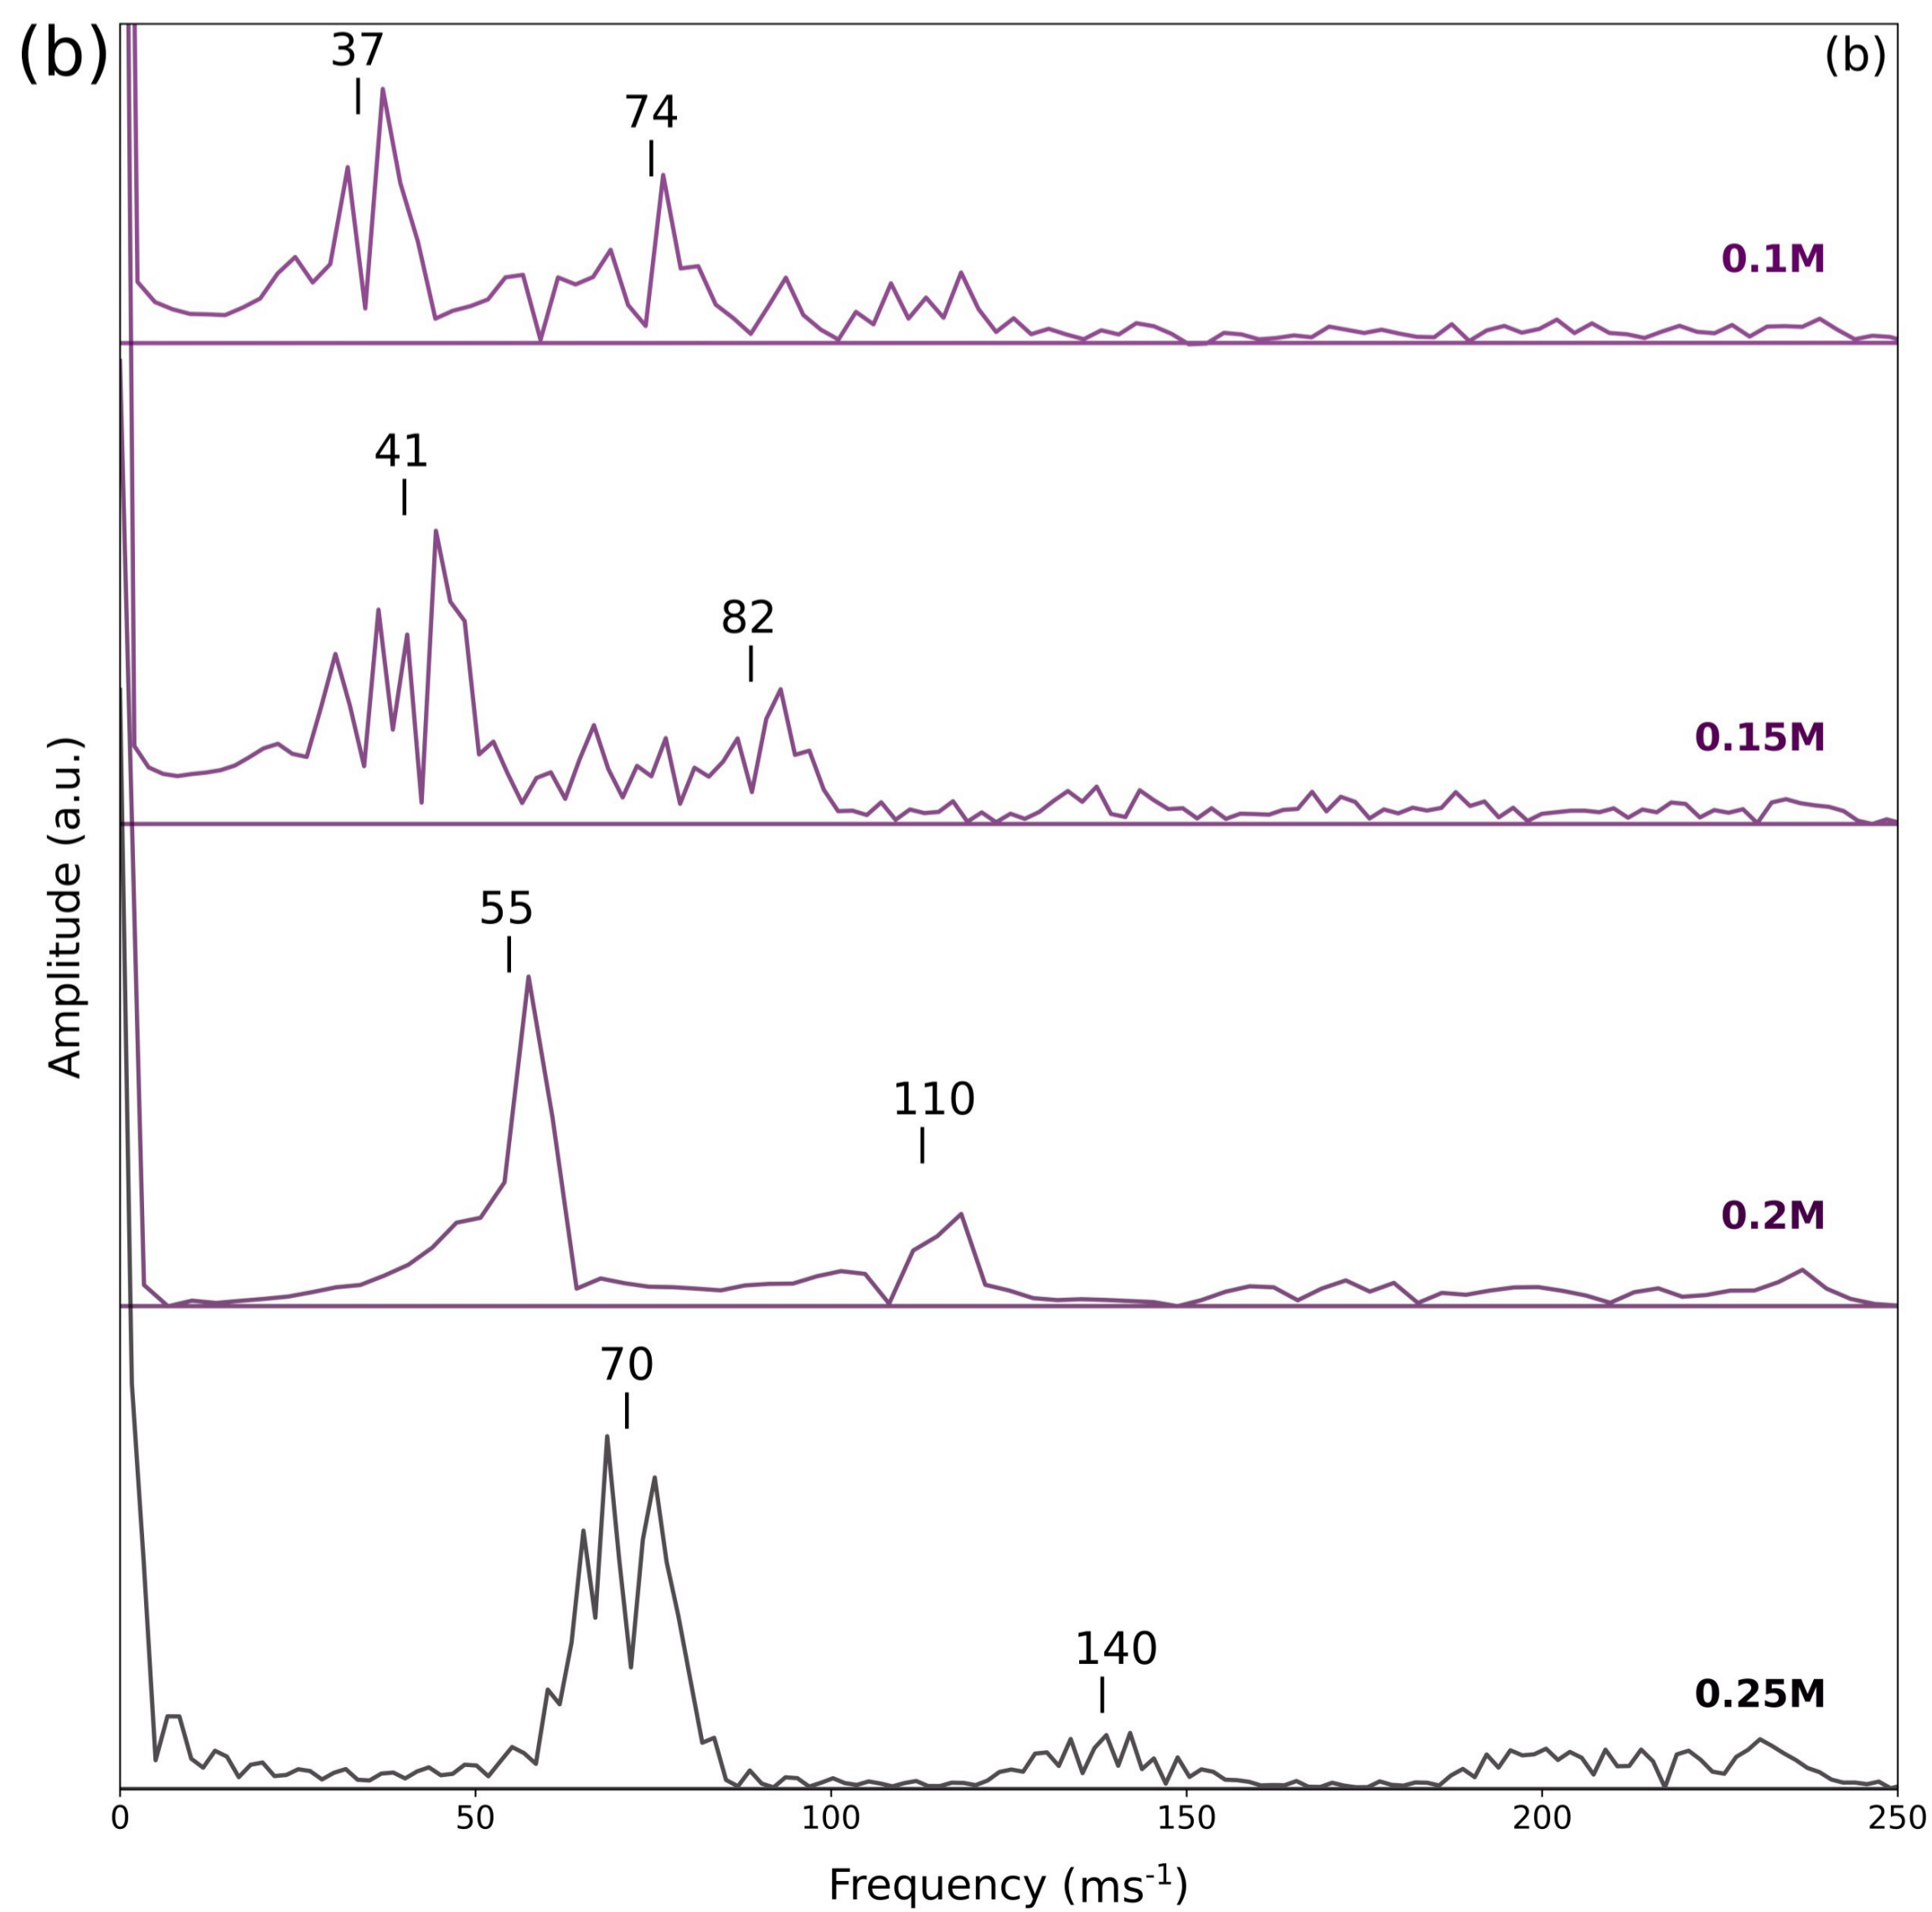

Supplement: d6ay00742b7.pdf [file d6ay00742b7.pdf]

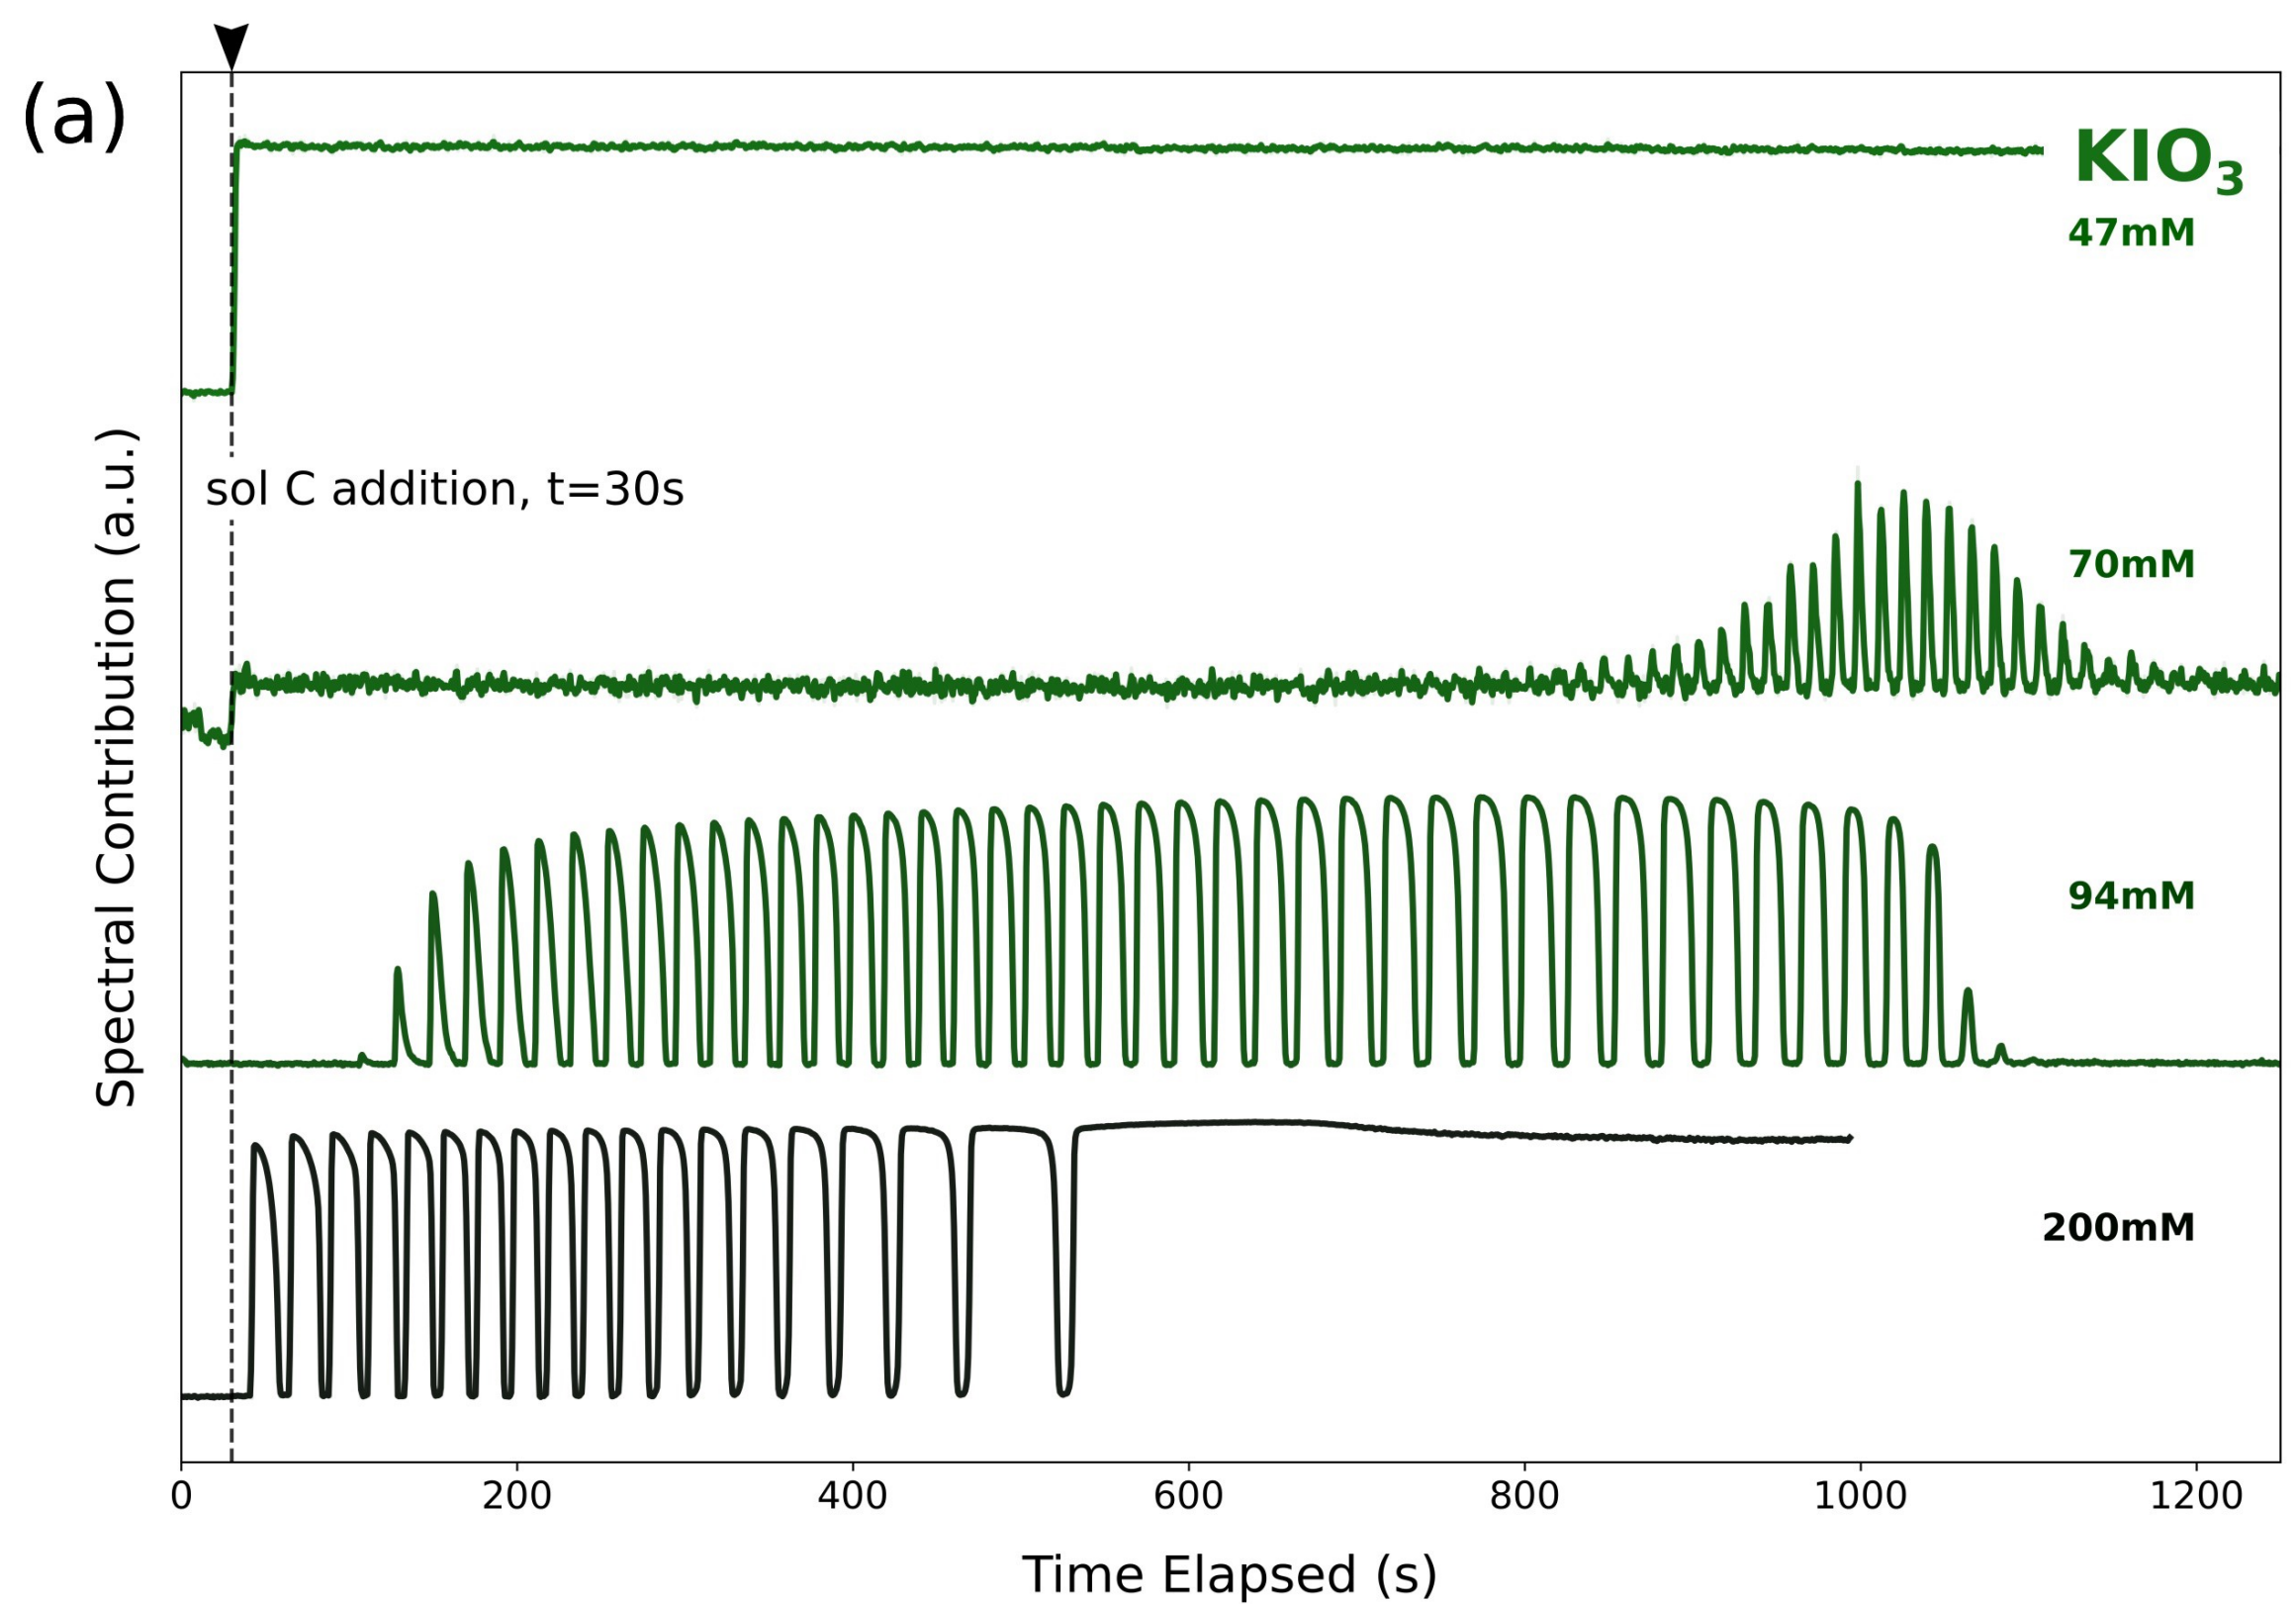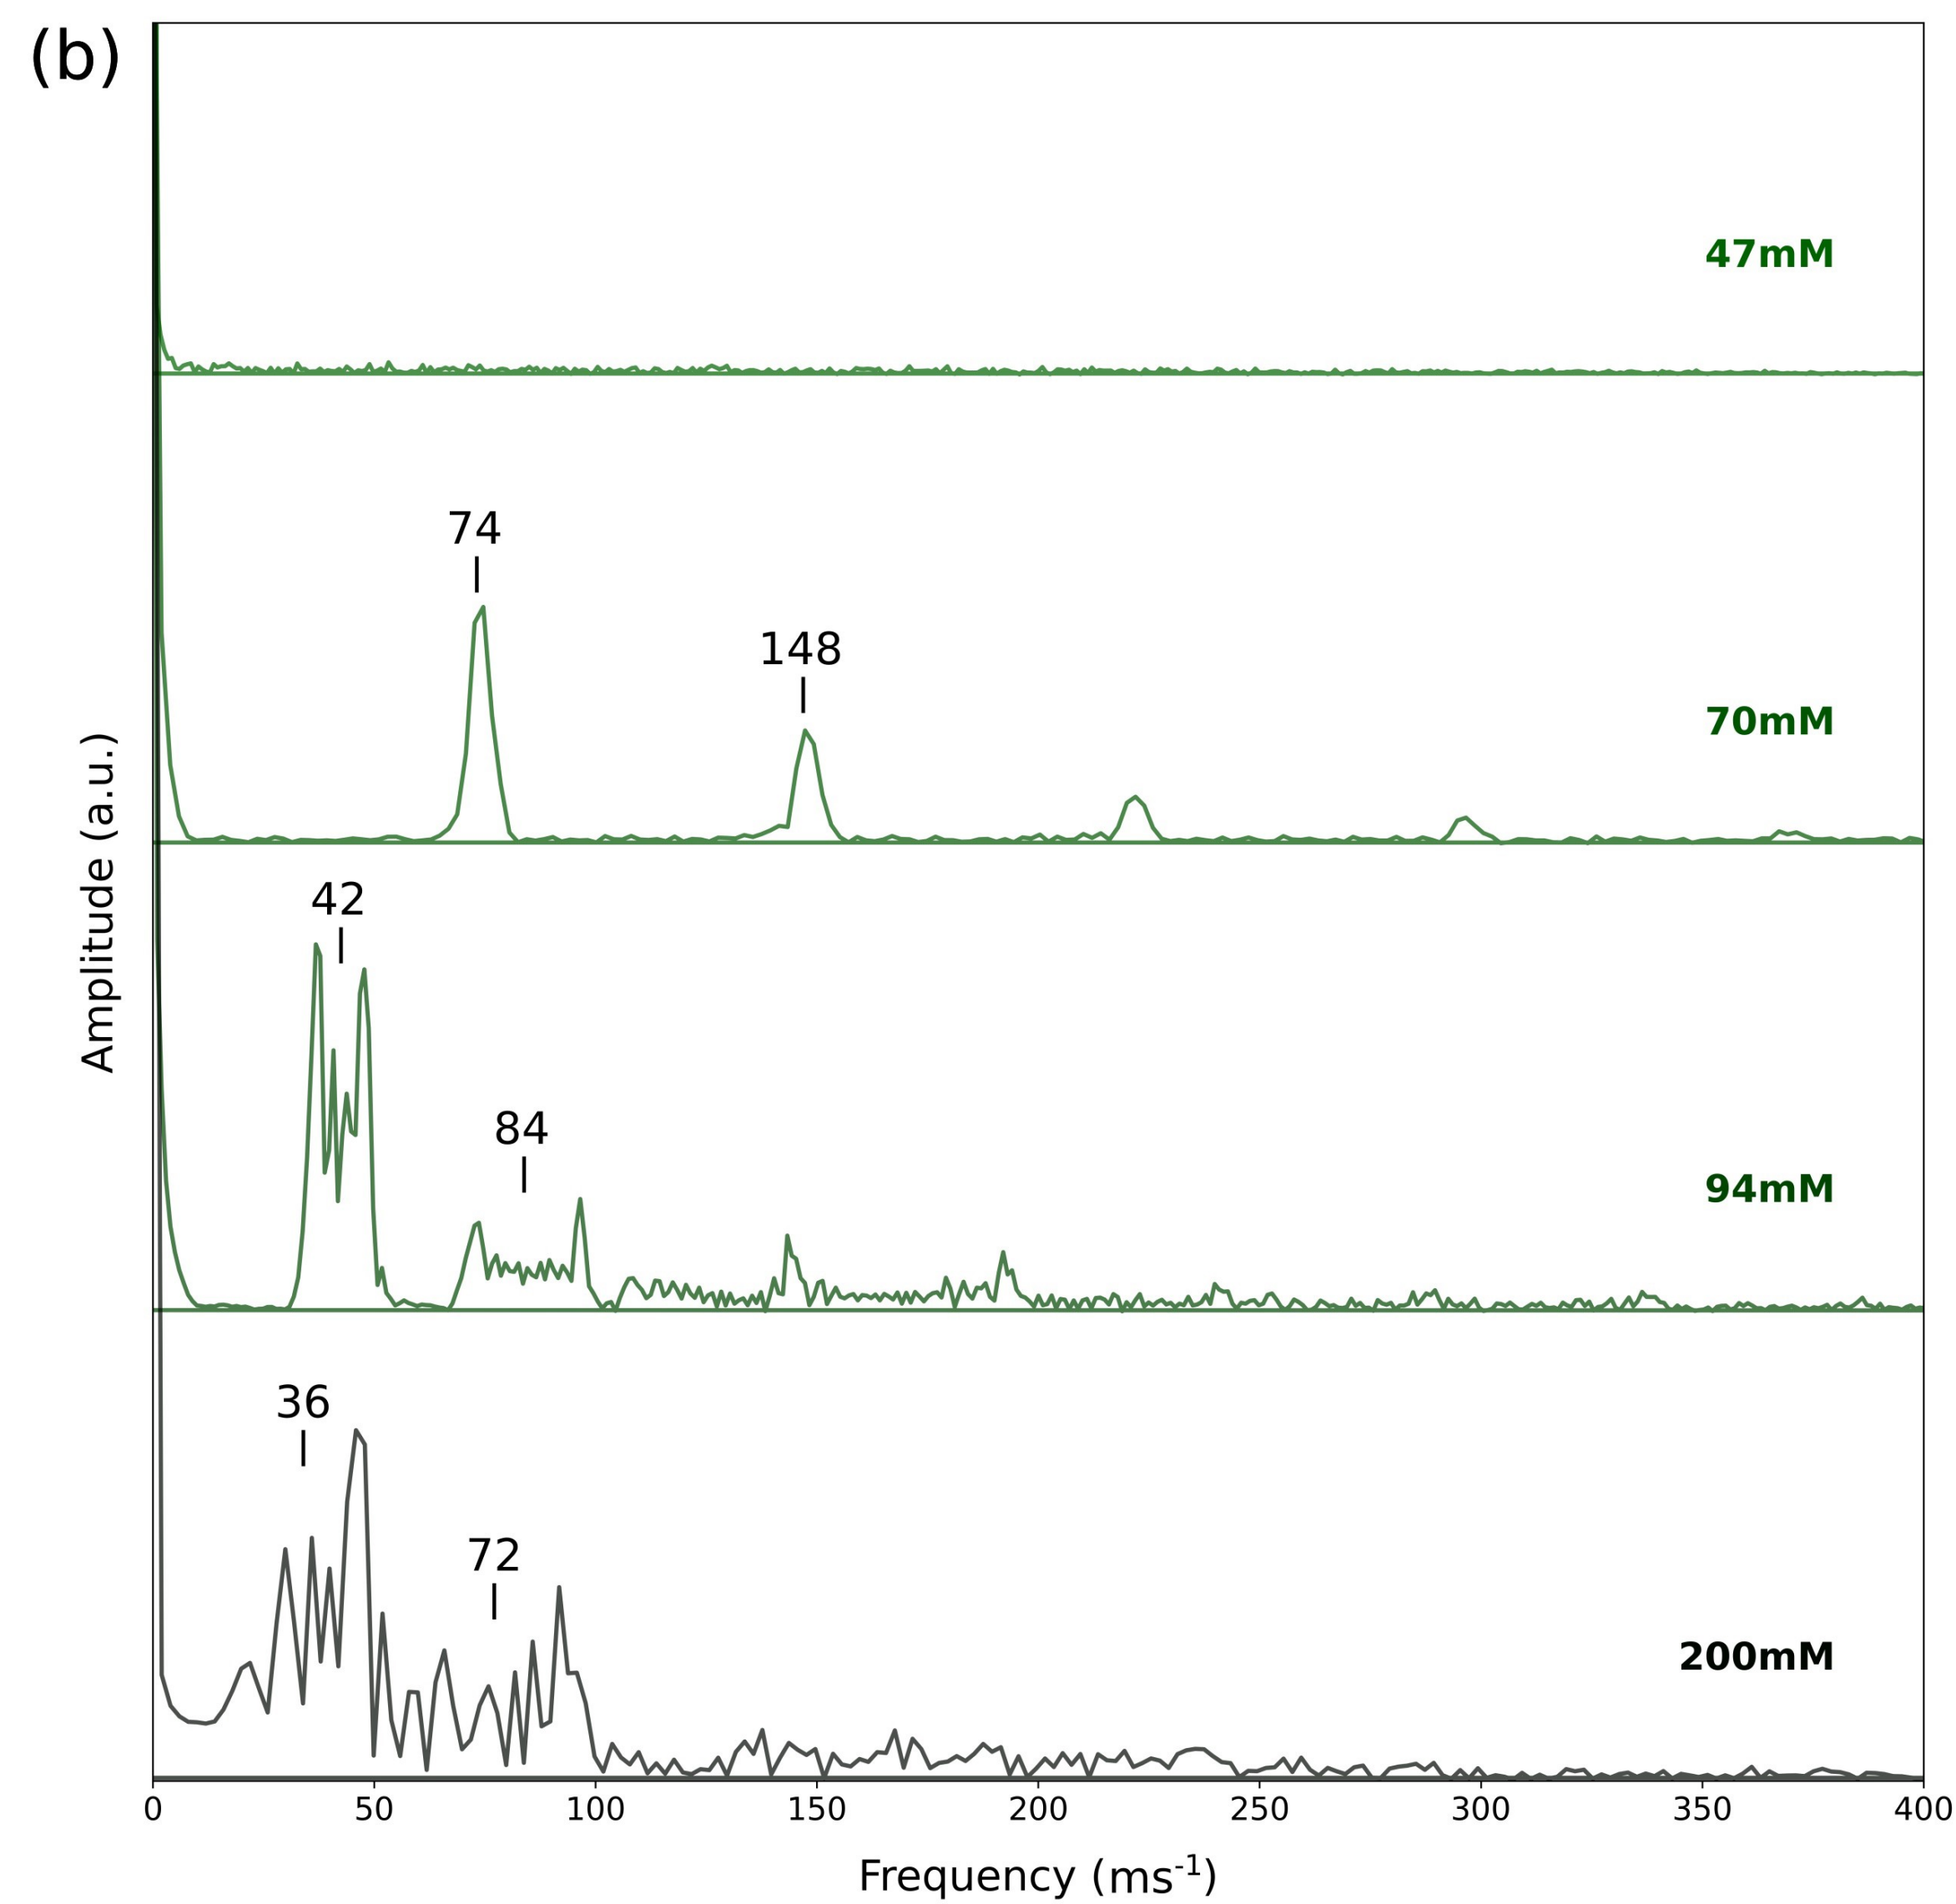

Supplement: d6ay00742b8.pdf [file d6ay00742b8.pdf]

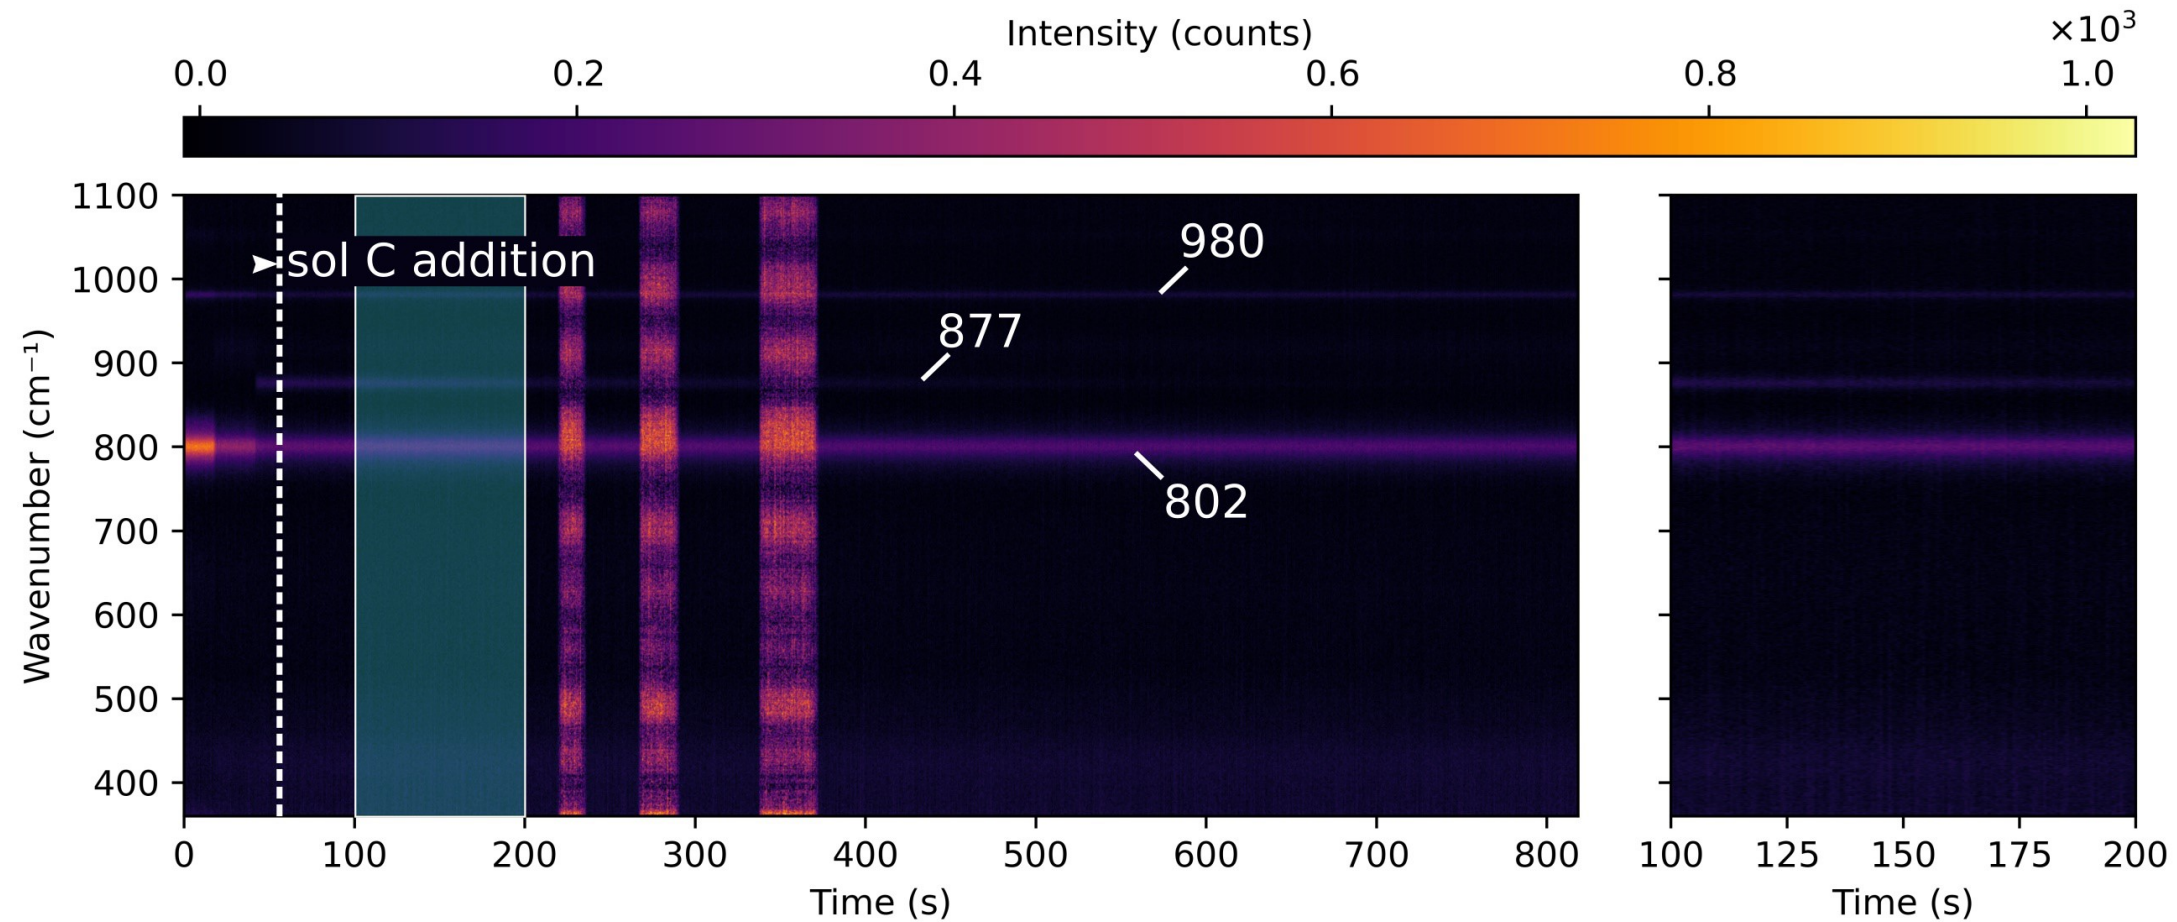

Supplement: d6ay00742b9.pdf [file d6ay00742b9.pdf]
